# Supplementary material
Source: Springer Nature journal article supplement (https://www.springermedizin.de/resource/supplementary/12913_2010_1672_MOESM1_ESM.PDF/9528724)
Supplement: MOESM1 [file 9528724]

Additional file 1: Survey questions.

- (i) In your local service, what is the standard referral pathway for people with tinnitus? Please number only the applicable options through the steps in the patient journey. Number them so that 1 = the first step, 2 = the next step, and so on.

\_\_\_\_ GP  
\_\_\_\_ Audiology (hospital setting)  
\_\_\_\_ Audiology (community setting)  
\_\_\_\_ ENT specialty  
\_\_\_\_ Clinical psychology  
\_\_\_\_ Other medical specialty

- (ii) How do tinnitus patients access your ENT/audiology service from their GP?

Select all that apply.

Direct access via GP referral

Choose-and-book system

- (iii) On average, how long does it take a person with tinnitus to reach the tinnitus specialist in your ENT/audiology service?

Less than 4 weeks

More than 4 but less than 8 weeks

More than 8 but less than 12 weeks

More than 12 but less than 16 weeks

More than 16 weeks

- (iv) Based on the referrals that you receive, how appropriately/effectively do you believe your local GPs manage people with tinnitus?

---

I do not feel able to comment (additional tick box)

- (v) Do you have the option to refer your tinnitus patients to other disciplines that offer a range of treatments? Select all that apply.

Medical

Surgical

Rehabilitative

Psychological

Psychiatric

- (vi) Do you have the option to refer your tinnitus patients to a clinical psychologist or other specialist outside the ENT/audiology service who is qualified in providing psychological therapy?

Yes/No

- (vii) What longer-term support networks are available locally?

---

- (viii) What do you consider as the main challenge for implementing an efficient referral pathway for tinnitus care across different levels of your NHS network?

---

Do not feel able to comment (additional tick box)

No challenge (additional tick box)

- (ix) From your point of view, how appropriate/effective is the referral process to and from your service for people whose primary complaint is tinnitus?

---

I do not feel able to comment (additional tick box)

- (x) What do you consider has been the main impact of the 18-week commissioning pathway?

---

Do not understand the pathway in enough detail to comment (additional tick box)

No impact (additional tick box)

- (xi) Has the management of patient appointments in your service changed as a result of the 18-week commissioning pathway?

Yes

No

Not sure

- (xii) Your job title:
